# Supplementary material for: Fast one-pot synthesis of a Se-rich MnCdSe solid solution for highly efficient cocatalyst-free photocatalytic H2 evolution
Source: Royal Society of Chemistry journal article supplement (doi:10.1039/d2cc01952c), 2022-01-01
Supplement: d2cc01952c1.pdf [file d2cc01952c1.pdf]

# Supporting Information

## **Fast one-pot synthesis of Se-rich MnCdSe solid solution for highly efficient cocatalyst-free photocatalytic H<sub>2</sub> evolution**

Jieqian Liu<sup>a</sup>, Yining Bao<sup>a</sup>, Yimin Liu<sup>a</sup>, Jingren Yang<sup>b</sup>, Toyohisa Fujita<sup>a</sup> and Deqian Zeng<sup>\*a</sup>

<sup>a</sup> *Guangxi Key Laboratory of Processing for Non-ferrous Metals and Featured Materials, School of Resources, Environment and Materials, Guangxi University, Nanning 530004, China. E-mail: dqzeng@gxu.edu.cn*

<sup>b</sup> *State Environmental Protection Key Laboratory of Environmental Health Impact Assessment of Emerging Contaminants, Shanghai Academy of Environmental Sciences, Shanghai 200233, China*

## **Experimental**

### **Preparation of Se-rich MnCdSe nanocrystals**

A class of Se-rich MnCdSe solid solutions was prepared through a facile one-pot solution-phase approach. Firstly, anhydrous cadmium chloride ( $\text{CdCl}_2$ ) (0.8 mmol, 0.6 mmol, 0.485 mmol, 0.4 mmol), 2.4 mmol of anhydrous manganese chloride ( $\text{MnCl}_2$ ), and 3 mmol of selenium (Se) powder were added into 16 mL of oleylamine in a three-neck flask. Then the mixture was heated up to 300°C for 1 h under an argon atmosphere. The precipitate was cooled down to room temperature and subsequently washed with n-hexane several times. Afterward, the product was collected after drying overnight under a vacuum at 60°C. Similarly, bare CdSe was prepared using the same method without adding  $\text{MnCl}_2$ . Finally, the final product was obtained through a ligand exchange process by exchanging the surface oleylamine with 3-mercaptopropionic acid (MPA), according to previous reports<sup>1,2</sup>.

### **Characterization**

The crystalline phases were studied by an X-ray diffractometer (XRD, Smartlab-3KW (Rigaku Ltd., Japan)). The SEM images were recorded on a scanning electron microscope (SEM, Hitachi SU8220). The TEM images were obtained from a Titan G260-300 transmission electron microscopy. Ultraviolet-visible (UV-vis) diffuse reflectance spectra were obtained from a Lambda-750 spectrometer. X-ray photoelectron spectroscopy (XPS) measurements were identified by a Thermo Fisher Scientific K-Alpha system. Time-resolved photoluminescence (TRPL) spectra (excitation wavelength: 380 nm) were derived from an FL3C-111 (HORIBA Instruments Inc.). The elemental composition of the samples was analyzed by coupled plasma-atomic emission spectroscopy (ICP-AES) using ICPS-7510 (Shimadzu, Japan).

## Photocatalytic H<sub>2</sub> evolution tests

The H<sub>2</sub> evolution measurements of the photocatalyst were performed on a sealed Pyrex flask reaction system. In a typical experiment, 30 mg of the photocatalyst was dispersed in 60 mL of 0.35 M Na<sub>2</sub>S/0.25 M Na<sub>2</sub>SO<sub>3</sub> aqueous solution. Then the mixture was degassed for 30 min by a vacuum pump to remove the dissolved gas. After that, the reactor was vertically irradiated by a 300 W Xe lamp equipped with a 420 nm UV cut-off filter. The generated H<sub>2</sub> was detected by online gas chromatography (GC-7920, N<sub>2</sub> as the carrier gas, TCD). The apparent quantum yield (AQY) was measured using a 420 nm band-pass filter according to the following equation.

$$\text{AQY (\%)} = \frac{\text{number of evolved hydrogen molecules} \times 2}{\text{number of incident photons}} \times 100\%$$

## Photoelectrochemical measurements

The photoelectrochemical (PEC) measurements were conducted on a VSP-300 (Biologic) electrochemical workstation. The working electrodes were prepared as follows: the photocatalyst (5 mg) was dissolved in ethanol (0.5 mL) containing Nafion (10 μL) and ultrasonicated for three hours. Then the ink was deposited on a 2.0 cm<sup>2</sup> ITO glass. The Ag/AgCl (3.5 M KCl) electrode, Pt sheet, and 0.1 M Na<sub>2</sub>SO<sub>4</sub> solution served as the reference electrode, counter electrode, and electrolyte, respectively. The photocurrent responses were tested under several visible-light on-off cycles at an applied potential of 0.2 V vs. Ag/AgCl. Electrochemical impedance spectroscopy (EIS) was measured over a frequency range from 10<sup>-1</sup> to 10<sup>5</sup> Hz. Mott-Schottky plots were determined at frequencies of 500, 1000, and 1500 Hz.

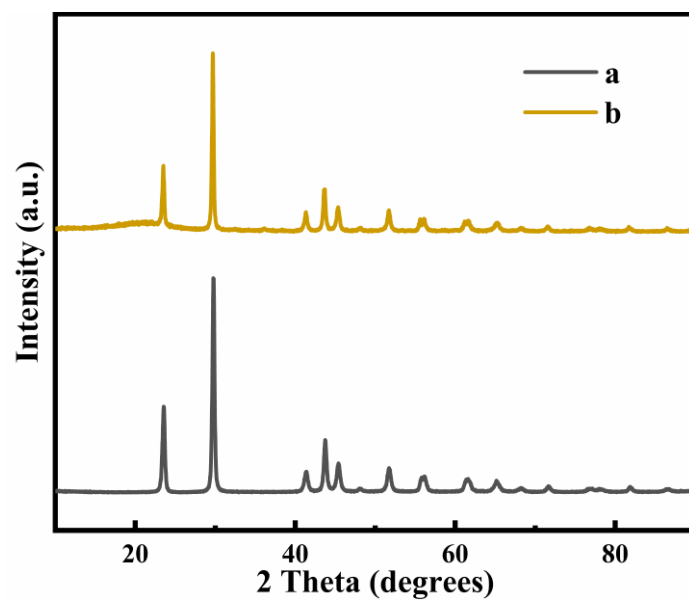

**Fig. S1.** XRD patterns of Se source (a) and the as-obtained product without adding  $\text{CdCl}_2$  precursor in the reaction solution (b).

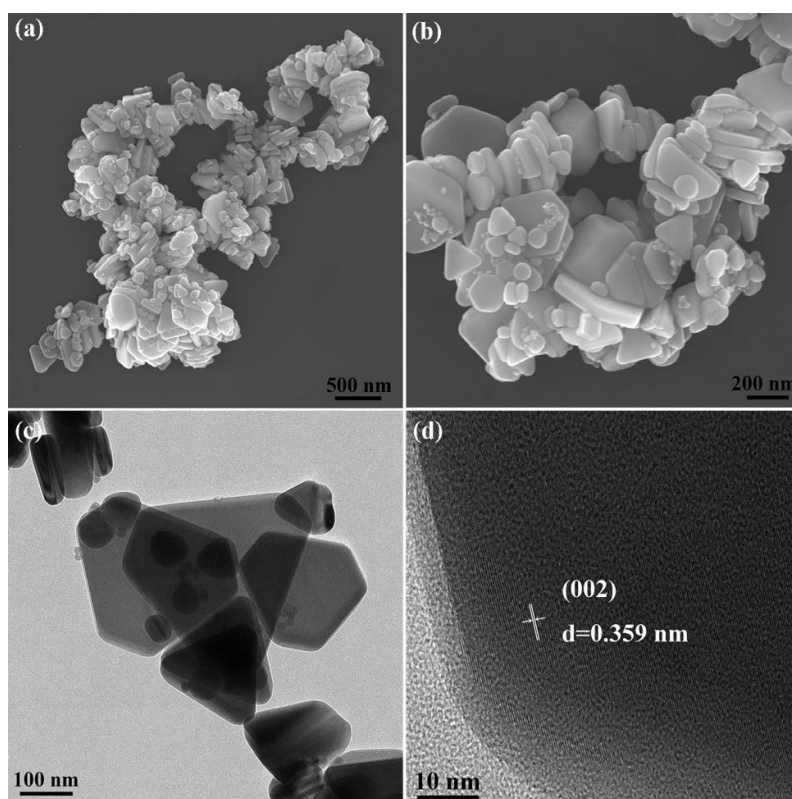

**Fig. S2.** (a, b) SEM, (c) TEM, and (d) HRTEM images of pure CdSe.

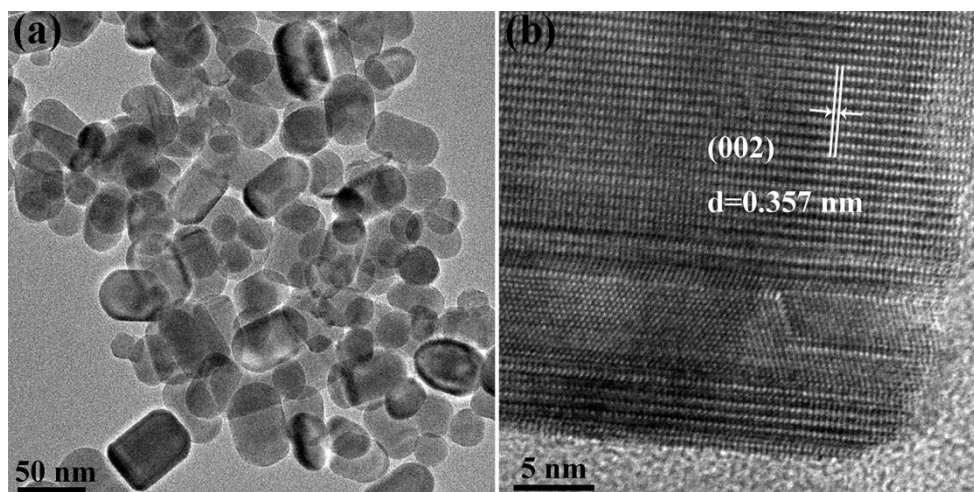

Fig. S3. (a) TEM and (b) HRTEM images of  $\text{Mn}_{0.33}\text{Cd}_{0.67}\text{Se}_{1+x}$ .

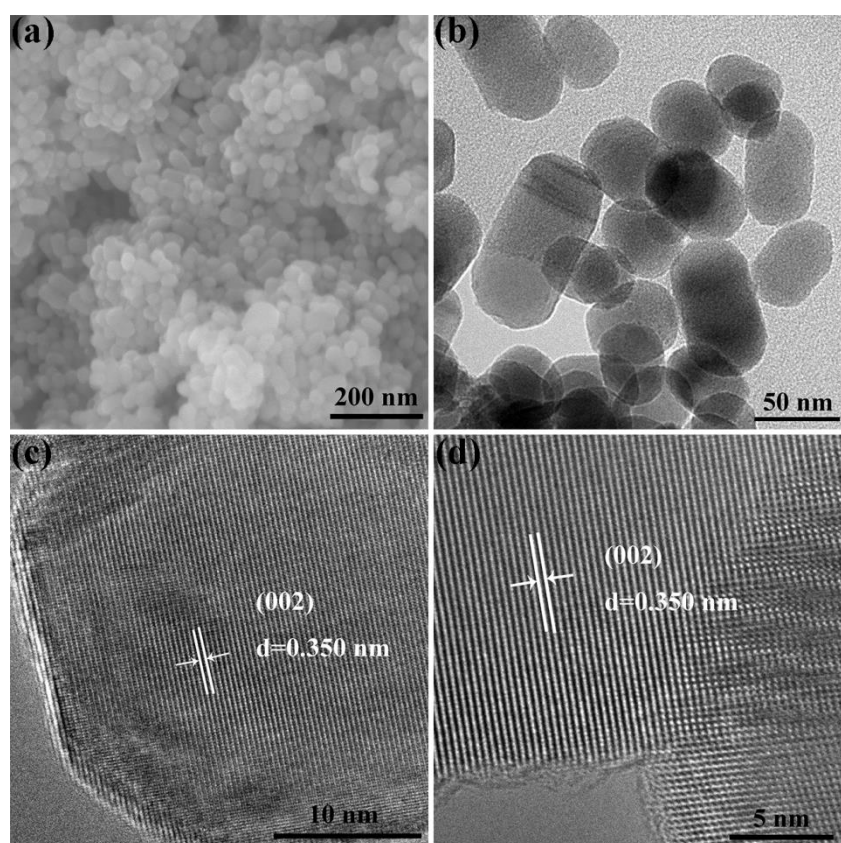

Fig. S4. (a) SEM, (b) TEM, and (c, d) HRTEM images of  $\text{Mn}_{0.46}\text{Cd}_{0.54}\text{Se}_{1+x}$ .

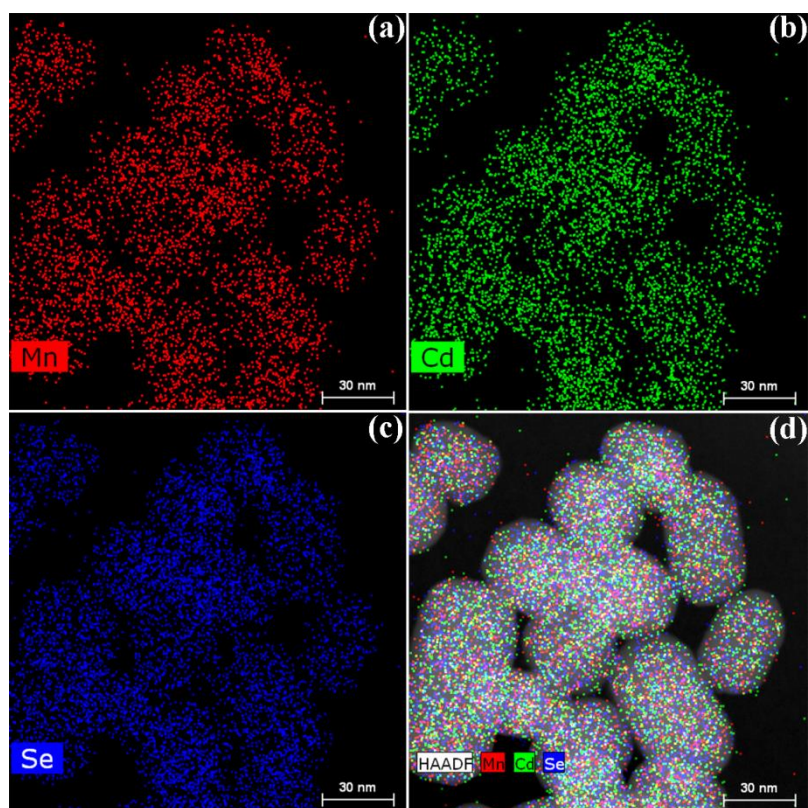

**Fig. S5.** Elemental mapping images of (a) Mn, (b) Cd, (c) Se, and (d) the corresponding overlapping image of Mn (red), Cd (green), and Se (blue) for  $\text{Mn}_{0.46}\text{Cd}_{0.54}\text{Se}_{1+x}$ .

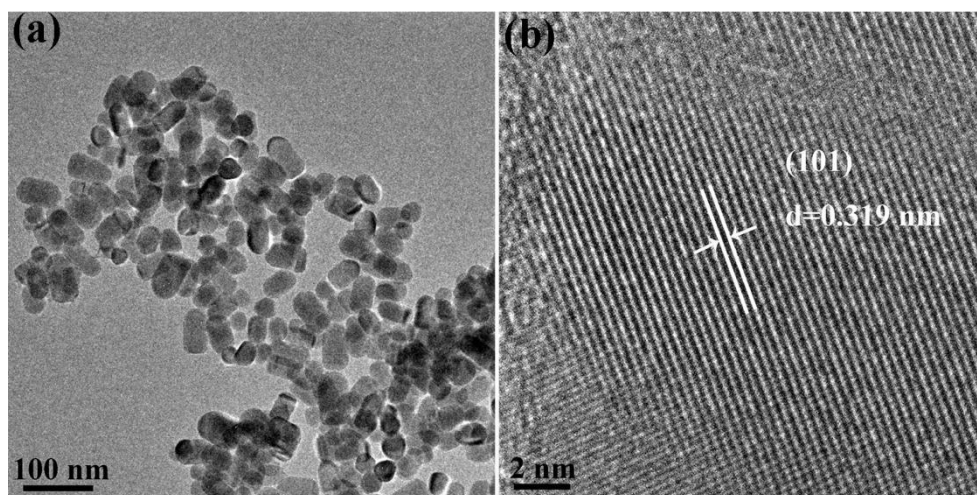

**Fig. S6.** (a) TEM and (b) HRTEM images of  $\text{Mn}_{0.70}\text{Cd}_{0.30}\text{Se}_{1+x}$ .

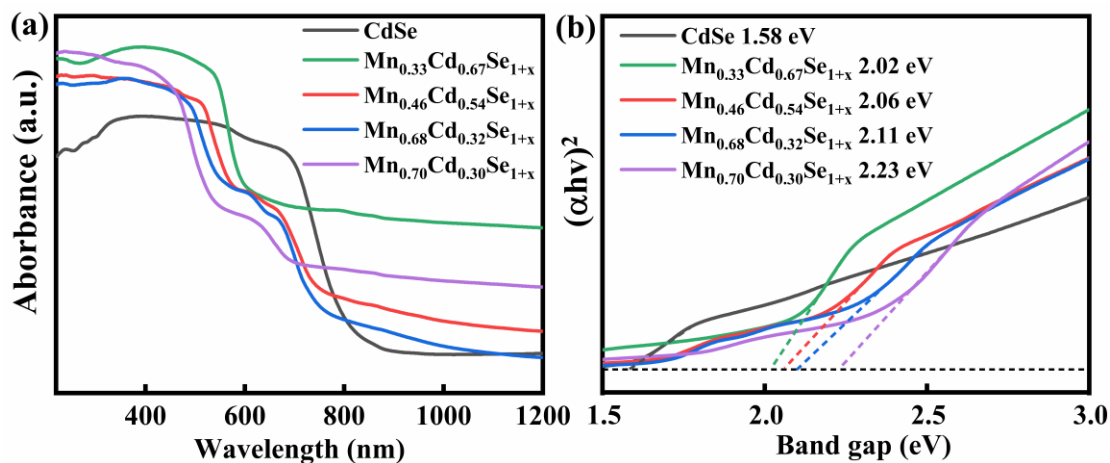

**Fig. S7.** (a) UV-vis diffuse reflectance spectra and (b) Tauc plots of pure CdSe and MnCdSe solid solutions.

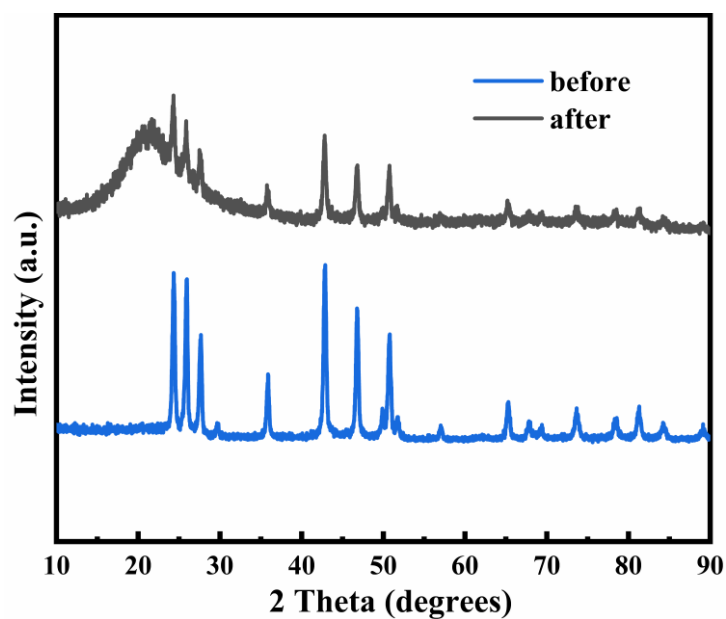

**Fig. S8.** XRD patterns of  $\text{Mn}_{0.68}\text{Cd}_{0.32}\text{Se}_{1+x}$  before and after the photocatalytic cycle experiment. (Note: The peak at about  $22^\circ$  in the spent  $\text{Mn}_{0.68}\text{Cd}_{0.32}\text{Se}_{1+x}$  can be ascribed to the characteristic peak of the quartz sample holder)

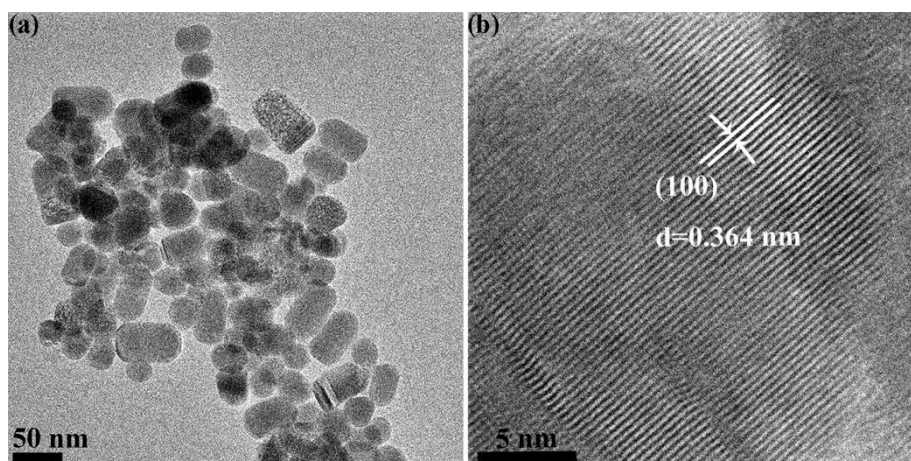

**Fig. S9.** TEM (a) and HRTEM images (b) of  $\text{Mn}_{0.68}\text{Cd}_{0.32}\text{Se}_{1+x}$  after the cycled photocatalytic experiment.

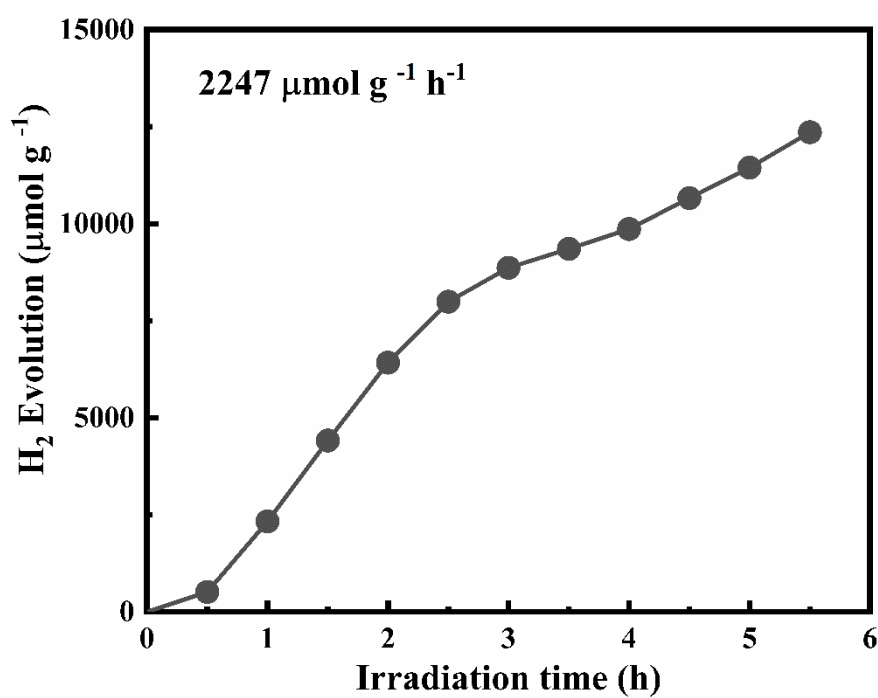

**Fig. S10.** Time course for photocatalytic  $\text{H}_2$  production of the recycled  $\text{Mn}_{0.68}\text{Cd}_{0.32}\text{Se}_{1+x}$  after 37 days.



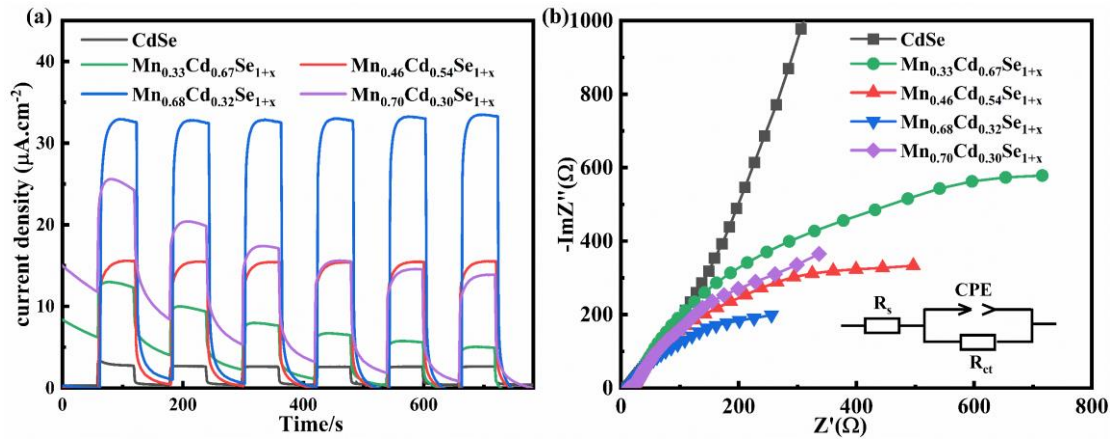

**Fig. S11.** (a) transient photocurrent responses and (b) EIS Nyquist plots (inset: equivalent circuit diagram) of pure CdSe, and MnCdSe solid solution.

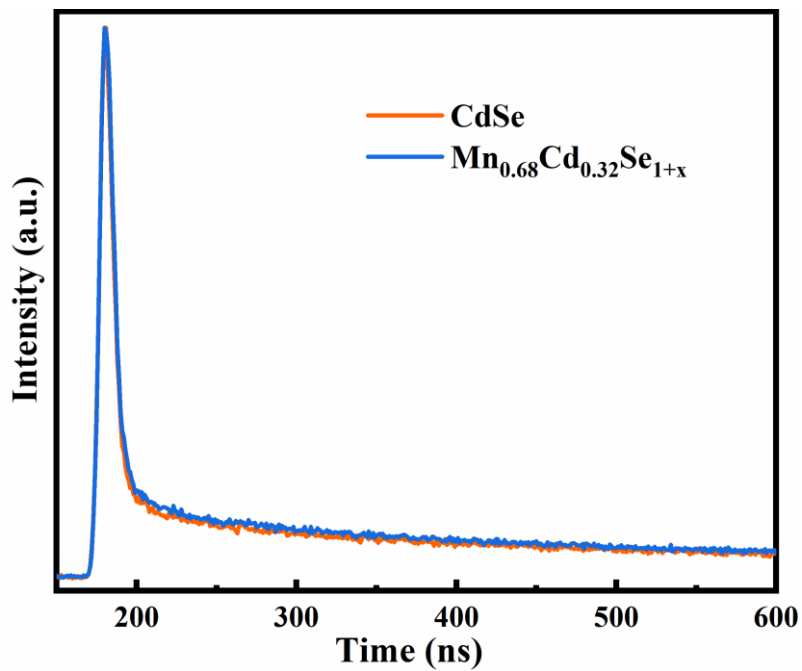

**Fig. S12.** Time-resolved photoluminescence (TRPL) spectra of CdSe, and  $\text{Mn}_{0.68}\text{Cd}_{0.32}\text{Se}_{1+x}$ .

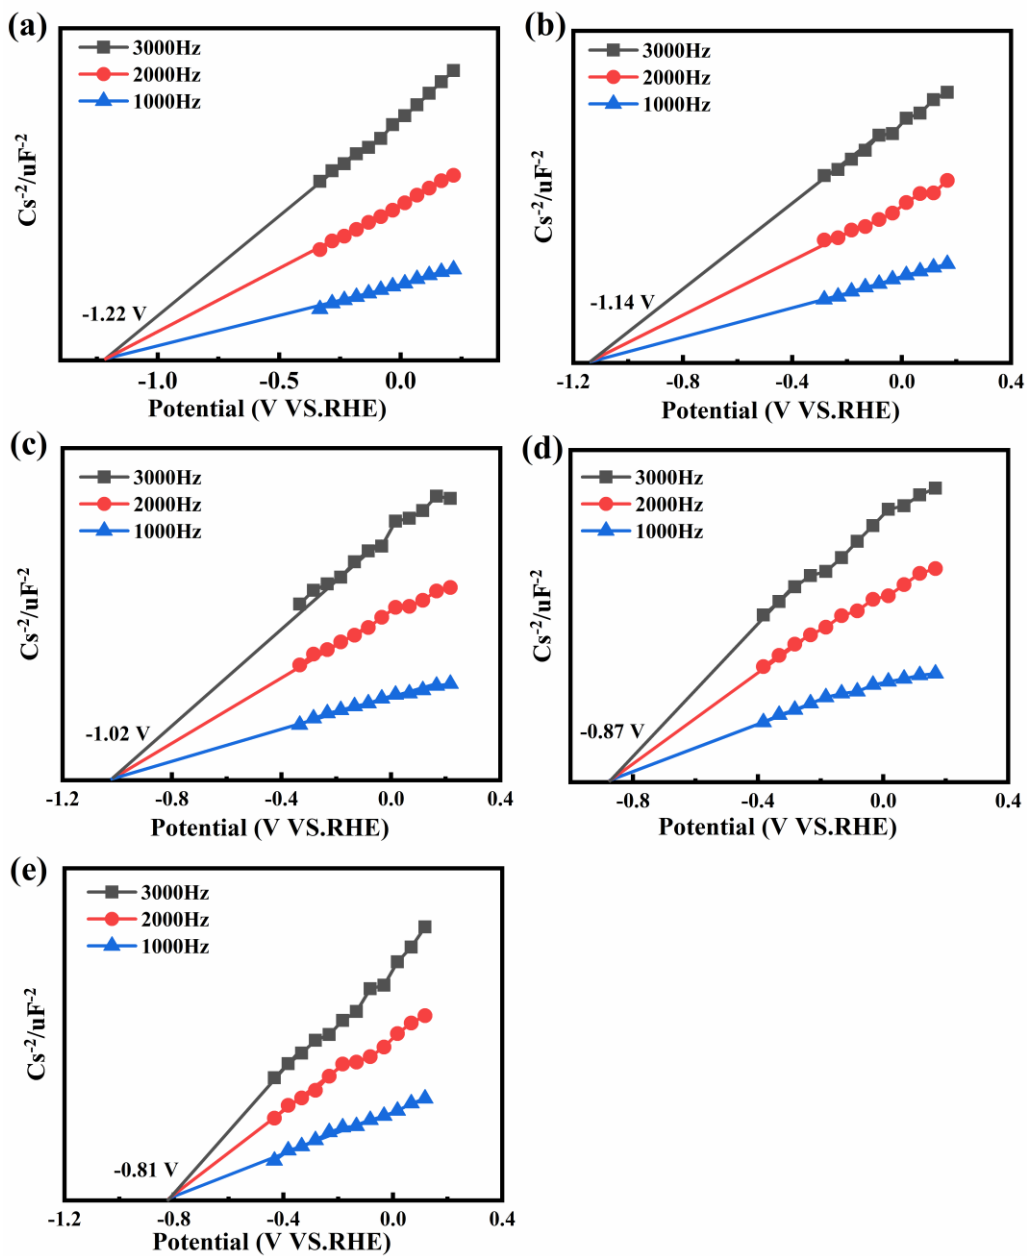

**Fig. S13.** Mott-Schottky plots of (a) CdSe, (b)  $\text{Mn}_{0.33}\text{Cd}_{0.67}\text{Se}_{1+x}$ , (c)  $\text{Mn}_{0.46}\text{Cd}_{0.54}\text{Se}_{1+x}$ , (d)  $\text{Mn}_{0.68}\text{Cd}_{0.32}\text{Se}_{1+x}$ , and (e)  $\text{Mn}_{0.70}\text{Cd}_{0.30}\text{Se}_{1+x}$  samples.

**Table. S1.** The Mn/Cd/Se molar ratio in the MnCdSe solid solutions was determined by inductively coupled plasma-atomic emission spectroscopy (ICP-AES).

| Samples                                                 | Precursor composition (mmol) |                   |    | ICP-AES              |
|---------------------------------------------------------|------------------------------|-------------------|----|----------------------|
|                                                         | MnCl <sub>2</sub>            | CdCl <sub>2</sub> | Se | Mn: Cd: Se           |
| CdSe                                                    | 0                            | 3                 | 3  | 0: 1: 1              |
| Mn <sub>0.33</sub> Cd <sub>0.67</sub> Se <sub>1+x</sub> | 2.4                          | 0.8               | 3  | 0.33: 0.67: (1+0.03) |
| Mn <sub>0.46</sub> Cd <sub>0.54</sub> Se <sub>1+x</sub> | 2.4                          | 0.6               | 3  | 0.46: 0.54: (1+0.07) |
| Mn <sub>0.68</sub> Cd <sub>0.32</sub> Se <sub>1+x</sub> | 2.4                          | 0.485             | 3  | 0.68: 0.32: (1+0.20) |
| Mn <sub>0.70</sub> Cd <sub>0.30</sub> Se <sub>1+x</sub> | 2.4                          | 0.4               | 3  | 0.70: 0.30: (1+0.18) |

**Table. S2.** Comparison of the photocatalytic H<sub>2</sub> evolution performance of the metal selenide photocatalysts.

| Catalysts                              | Light Source                                                    | Sacrificial reagent                                  | H <sub>2</sub> Evolution Rate ( $\mu\text{mol g}^{-1} \text{h}^{-1}$ ) | AQY (%) (Wavelength) | Ref.             |
|----------------------------------------|-----------------------------------------------------------------|------------------------------------------------------|------------------------------------------------------------------------|----------------------|------------------|
| CdSe/ZnCr-LDH                          | 300 W Xe lamp ( $\lambda \geq 420 \text{ nm}$ )                 | Na <sub>2</sub> S /Na <sub>2</sub> SO <sub>3</sub>   | 2196                                                                   | ---                  | 3                |
| In <sub>2</sub> Se <sub>3</sub> NPS    | 300 W Xe lamp ( $\lambda \geq 420 \text{ nm}$ )                 | Na <sub>2</sub> S /Na <sub>2</sub> SO <sub>3</sub>   | 1347.59                                                                | ---                  | 4                |
| ZnO-CdSe                               | 300 W Xe lamp ( $\lambda \geq 420 \text{ nm}$ )                 | Na <sub>2</sub> S /Na <sub>2</sub> SO <sub>3</sub>   | 1045                                                                   | ---                  | 5                |
| FeSe <sub>2</sub> /ZnSe                | 300 W Xe lamp                                                   | methanol                                             | 1228                                                                   | 4.1% (360 nm)        | 6                |
| CdSe                                   | 275 W Xe lamp ( $\lambda > 400 \text{ nm}$ )                    | Na <sub>2</sub> S /Na <sub>2</sub> SO <sub>3</sub>   | 233                                                                    | ---                  | 7                |
| Zn <sub>0.5</sub> Cd <sub>0.5</sub> Se | 300 W Xe lamp ( $\lambda \geq 400 \text{ nm}$ )                 | Na <sub>2</sub> S /Na <sub>2</sub> SO <sub>3</sub>   | 10 ( $\mu\text{mol h}^{-1}$ )                                          | ---                  | 8                |
| CdSe QDs                               | 300 W Xe lamp ( $\lambda \geq 420 \text{ nm}$ )                 | Na <sub>2</sub> SO <sub>3</sub>                      | 630                                                                    | ---                  | 9                |
| CdSe                                   | 300 W Xe lamp ( $\lambda \geq 400 \text{ nm}$ )                 | Na <sub>2</sub> S /Na <sub>2</sub> SO <sub>3</sub>   | 1153                                                                   | ---                  | 10               |
| ZnSe                                   | 500 W Xe lamp ( $\lambda > 420 \text{ nm}$ )                    | Ascorbic acid                                        | 330                                                                    | ---                  | 11               |
| ZnSe/ZnS                               | 500 W Xe lamp ( $\lambda > 420 \text{ nm}$ )                    | Ascorbic acid                                        | 1810                                                                   | 1.57% (420 nm)       | 11               |
| CdSe                                   | 300 W Xe lamp ( $\lambda > 420 \text{ nm}$ )                    | Na <sub>2</sub> S /Na <sub>2</sub> SO <sub>3</sub>   | 6                                                                      | ---                  | 12               |
| ZnSe                                   | 300 W Xe lamp ( $\lambda > 420 \text{ nm}$ )                    | Na <sub>2</sub> S /Na <sub>2</sub> SO <sub>3</sub>   | 1056                                                                   | ---                  | 12               |
| Zn <sub>0.5</sub> Cd <sub>0.5</sub> Se | 300 W Xe lamp ( $\lambda \geq 420 \text{ nm}$ )                 | Na <sub>2</sub> S /Na <sub>2</sub> SO <sub>3</sub>   | 438.3                                                                  | 1.7% (420 nm)        | 13               |
| <b>MnCdSe</b>                          | <b>300 W Xe lamp (<math>\lambda &gt; 420 \text{ nm}</math>)</b> | <b>Na<sub>2</sub>S /Na<sub>2</sub>SO<sub>3</sub></b> | <b>2582</b>                                                            | <b>7.5% (420 nm)</b> | <b>This work</b> |

**Table. S3.** Fitting results of the Nyquist plots for CdSe, and MnCdSe solid solution.

| Photocatalyst                | $R_s$<br>( $\Omega$ ) | $R_{ct}$<br>( $\Omega$ ) | CPE<br>( $F \cdot cm^{-2} \cdot S^{n-1}$ ) | n    |
|------------------------------|-----------------------|--------------------------|--------------------------------------------|------|
| CdSe                         | 16.55                 | 21306                    | 2.9E-3                                     | 0.78 |
| $Mn_{0.33}Cd_{0.67}Se_{1+x}$ | 17.81                 | 1852                     | 1.2E-3                                     | 0.78 |
| $Mn_{0.46}Cd_{0.54}Se_{1+x}$ | 16.63                 | 1210                     | 1.8E-3                                     | 0.74 |
| $Mn_{0.68}Cd_{0.32}Se_{1+x}$ | 16.41                 | 1146                     | 4.1E-3                                     | 0.70 |
| $Mn_{0.70}Cd_{0.30}Se_{1+x}$ | 17.65                 | 1699                     | 2.2E-3                                     | 0.78 |

**Note:**  $R_s$  is Ohm internal resistance,  $R_{ct}$  represents the charge transfer resistance, and CPE is the constant phase element.

## References

1. R. Abargues, J. Navarro, P. J. Rodriguez-Canto, A. Maulu, J. F. Sanchez-Royo and J. P. Martinez-Pastor, *Nanoscale*, 2019, **11**, 1978-1987.
2. W. Wang, T. Ding, G. Chen, L. Zhang, Y. Yu and Q. Yang, *Nanoscale*, 2015, **7**, 15106-15110.
3. G. Zhang, B. Lin, Y. Qiu, L. He, Y. Chen and B. Gao, *Int. J. Hydrogen Energy*, 2015, **40**, 4758-4765.
4. R. Wang, J. Wan, J. Jia, W. Xue, X. Hu, E. Liu and J. Fan, *Mater. Des.*, 2018, **151**, 74-82.
5. X. Wang, C. Zhou, W. Wang, B. Du, J. Cai, G. Feng and R. Zhang, *J. Alloy Compd.*, 2018, **747**, 826-833.
6. J. Zhang, P. Tian, T. Tang, G. Huang, J. Zeng, B. Cui, Z. Shen, H. Wang, Z. Kong, J. Xi and Z. Ji, *Int. J. Hydrogen Energy*, 2020, **45**, 8526-8539.
7. R. Bera, A. Dutta, S. Kundu, V. Polshettiwar and A. Patra, *J. Phys. Chem. C*, 2018, **122**, 12158-12167.
8. J. Y. Choi, K. M. Nam and H. Song, *J. Mater. Chem. A*, 2018, **6**, 16316-16321.
9. I. Grigioni, M. Bernareggi, G. Sinibaldi, M. V. Dozzi and E. Selli, *Appl. Catal., A*, 2016, **518**, 176-180.

10. A. Thibert, F. A. Frame, E. Busby, M. A. Holmes, F. E. Osterloh and D. S. Larsen, *J. Phys. Chem. Lett.*, 2011, **2**, 2688-2694.
11. Y. Feng, M. Xu, P.-L. Tremblay and T. Zhang, *Int. J. Hydrogen Energy*, 2021, **46**, 21901-21911.
12. L. Wei, D. Zeng, J. Liu, H. Zheng, T. Fujita, M. Liao, C. Li and Y. Wei, *J. Colloid Interface Sci.*, 2022, **608**, 3087-3097.
13. L. Wei, D. Zeng, X. He, L. Wang, Y. Bao, G. He, T. Fujita and W.-J. Ong, *Adv. Energy Sustainability Res.*, 2022, **n/a**, 2100210.
